# Supplementary material for: Surface charge tunable catanionic vesicles based on serine-derived surfactants as efficient nanocarriers for the delivery of the anticancer drug doxorubicin
Source: Royal Society of Chemistry journal article supplement (doi:10.1039/c8nr06346j), 2018-12-05
Supplement: c8nr06346j1.pdf [file c8nr06346j1.pdf]

## SUPPLEMENTARY INFORMATION

### Surface charge tunable cationic vesicles based on serine-derived surfactants as efficient nanocarriers for the delivery of the anticancer drug doxorubicin

Raquel C. F. Gonçalves Lopes,<sup>†a,b</sup> Oscar F. Silvestre,<sup>†a</sup> Ana Rita Faria,<sup>a</sup> M. Luísa do Vale,<sup>c</sup> Eduardo F. Marques<sup>\*b</sup> and Jana B. Nieder<sup>\*a</sup>

<sup>a</sup>Department of Nanophotonics, Ultrafast Bio- and Nanophotonics group, INL - International Iberian Nanotechnology Laboratory, Av. Mestre José Veiga s/n, 4715-330 Braga, Portugal.

\*jana.nieder@inl.int

<sup>b</sup>CIQUP, Department of Chemistry and Biochemistry, Faculty of Sciences, University of Porto, Rua do Campo Alegre s/n, 4169-007 Porto, Portugal.

\*efmarque@fc.up.pt

<sup>c</sup>LAQV-REQUIMTE, Department of Chemistry and Biochemistry, Faculty of Sciences, University of Porto, 4169-007 Porto, Portugal.

† These authors contributed equally to this work.

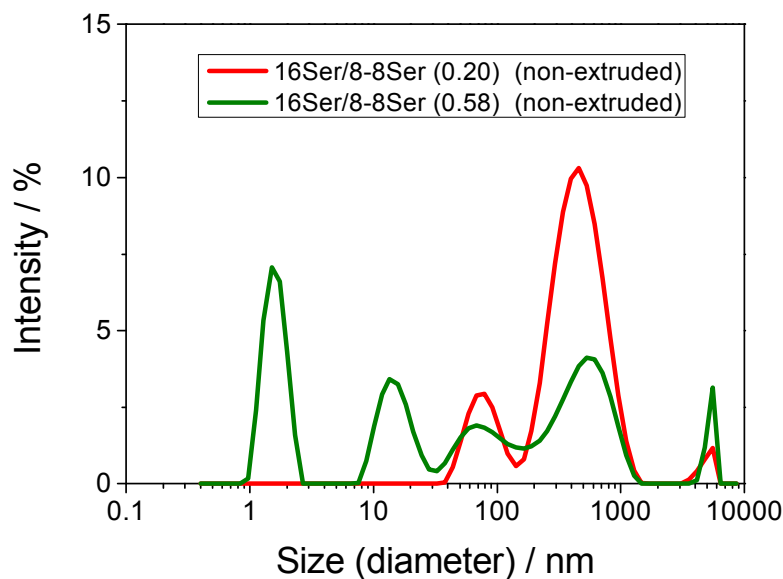

**Fig. S1.** Size distribution plot of the spontaneous (non-extruded) and empty (non-DOX loaded) 16Ser/8-8Ser vesicles showing very polydisperse populations for both the (0.20) and (0.58) systems.

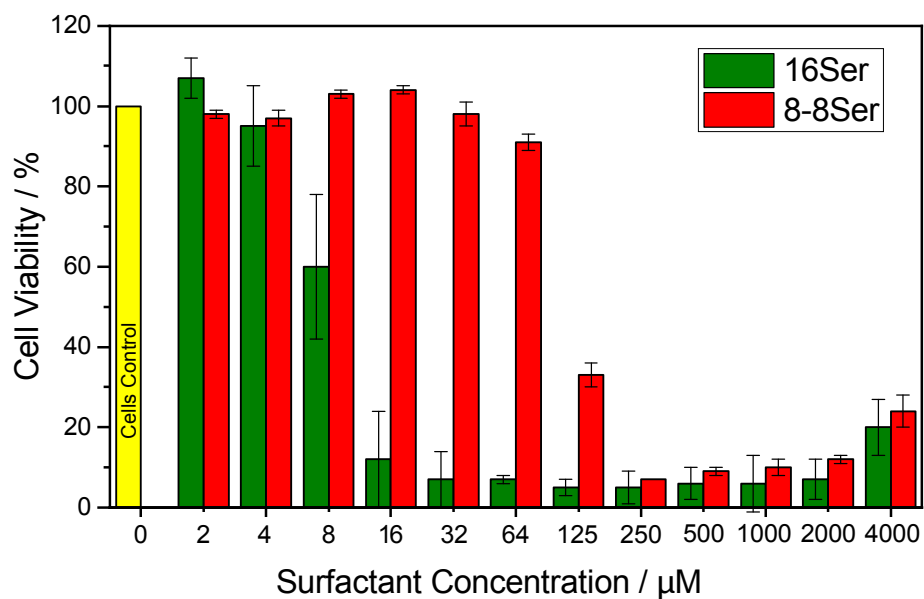

Fig. S2. Viability of A549 cells after 72 h of incubation with neat serine-based surfactants 16Ser and 8-8Ser.

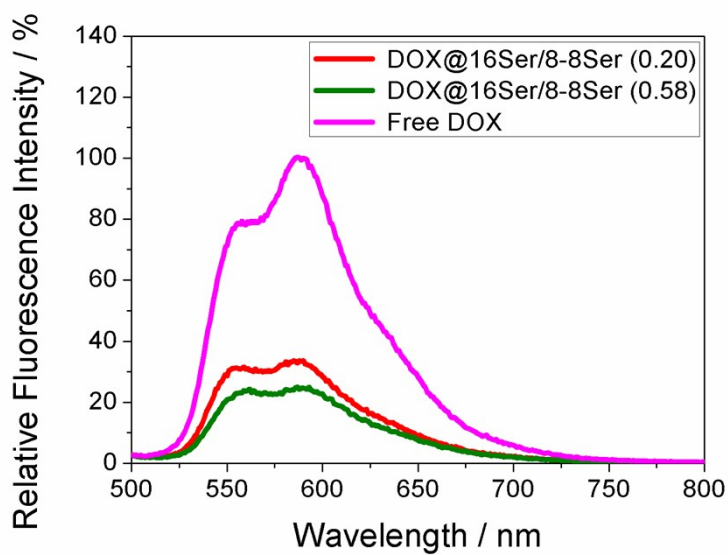

Fig. S3. DOX sample suspensions fluorescence of both drug loaded 16Ser/8-8Ser vesicles after washing compared to free DOX at 100  $\mu\text{M}$  concentration.

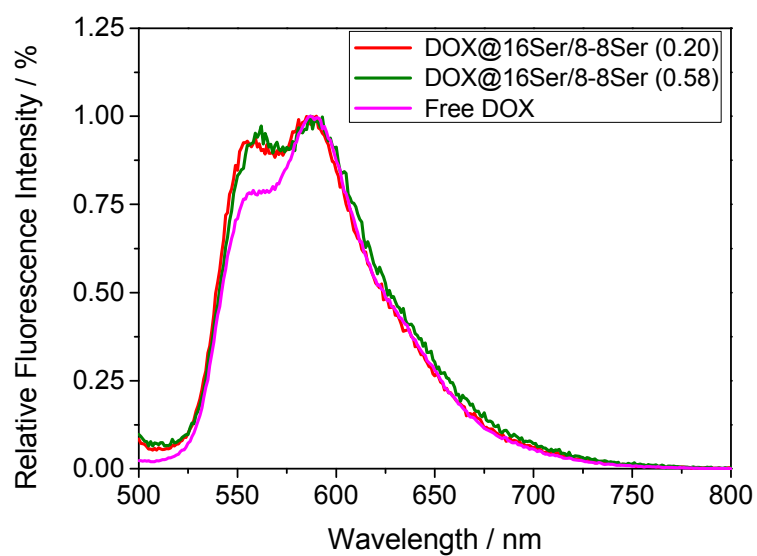

**Fig. S4.** Normalized fluorescence spectra of free DOX and sample suspensions of both DOX loaded 16Ser/8-8Ser vesicles after washing.

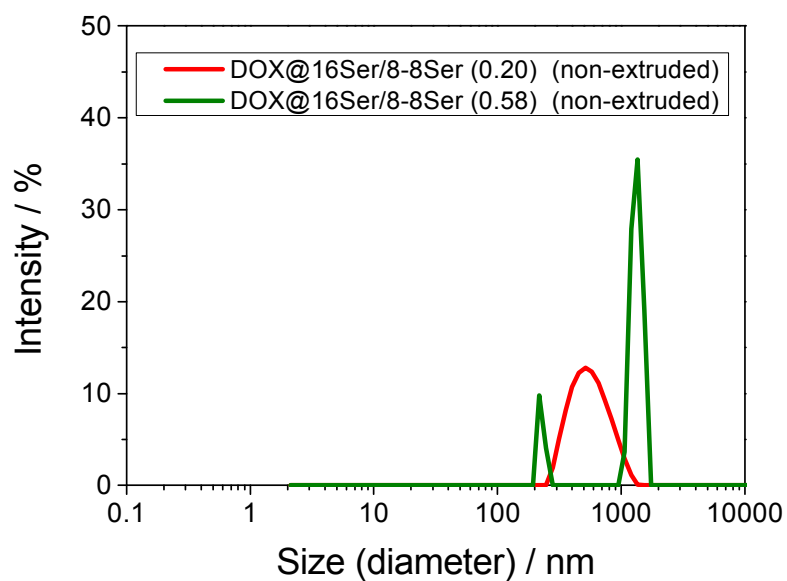

**Fig. S5.** Size distribution plot of the spontaneous (non-extruded) DOX-loaded 16Ser/8-8Ser vesicles for both the (0.20) and (0.58) systems.

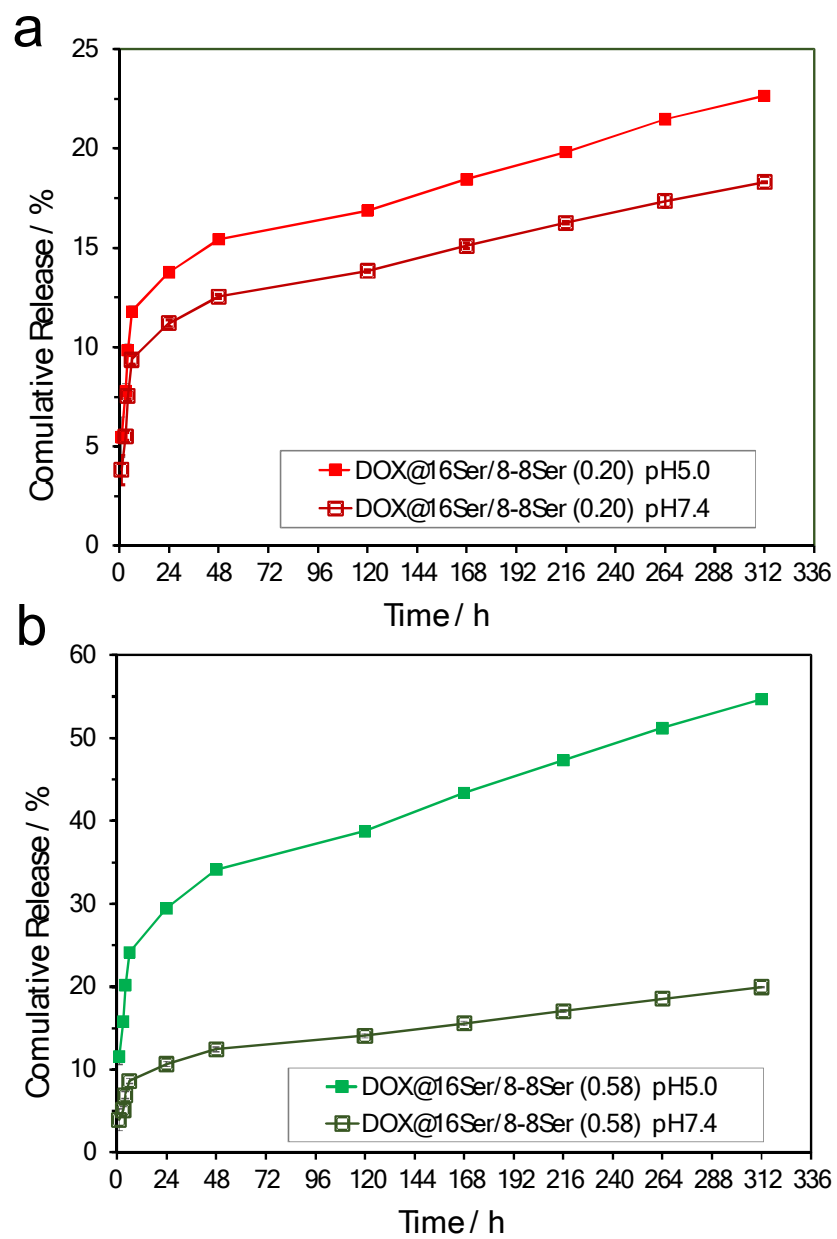

**Fig. S6.** Release profiles of Doxorubicin (DOX) from (a) DOX@16Ser/8-8Ser (0.20) and (b) DOX@16Ser/8-8Ser (0.58) in pH 5.0 and pH 7.4 PBS solutions at 37°C, respectively.
